# Supplementary material
Source: PubMed Central journal article supplement (PMC9576707)
Supplement: 41467_2022_33758_MOESM3_ESM.pdf [file 41467_2022_33758_MOESM3_ESM.pdf]

## **Description of Additional Supplementary Information Files Document**

Supplementary Dataset 1 | datasets.xlsx – The details of the public datasets

Supplementary Dataset 2 | clustering information.xlsx - Parameters and cluster numbers of different Methods

Supplementary Dataset 3 | Inflammatory and cytokine genes.xlsx - Inflammatory and cytokine genes
